# Supplementary material
Source: publisher figshare collection journal article supplement (https://future-science-group.figshare.com/articles/dataset/_/23653107)
Supplement: Supplementary file 1 [file 1]

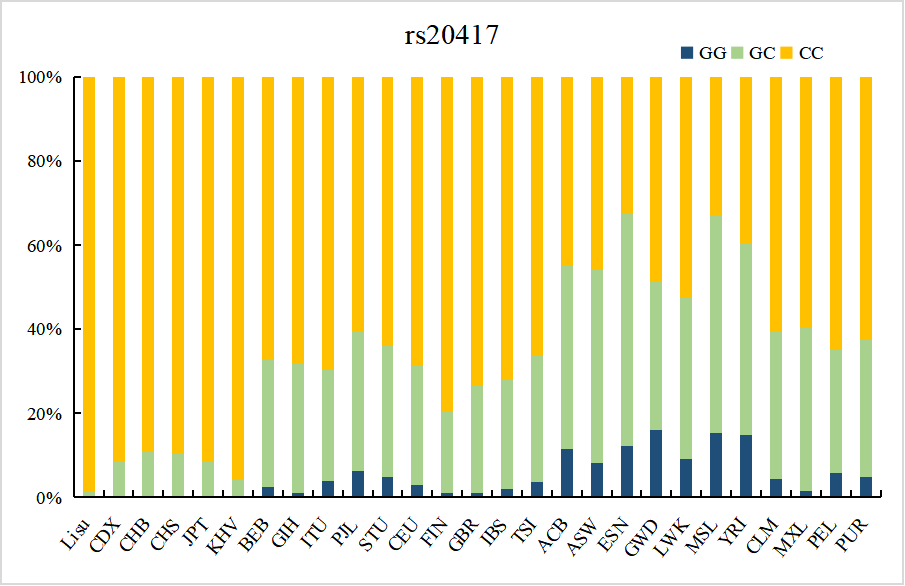


**Supplementary Figure 1** The genotype frequency distribution of rs20417 (*PTGS2*) among 27 populations. The value of the Y axis represents the genotype frequency (%).


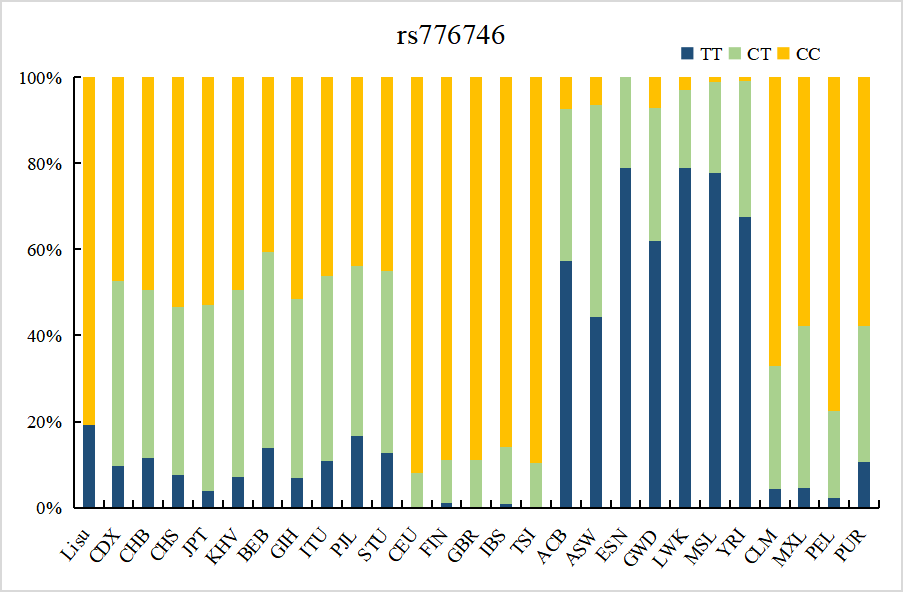


**Supplementary Figure 2** The genotype frequency distribution of rs776746 (*CYP3A5*) among 27 populations. The value of the Y axis represents the genotype frequency (%).


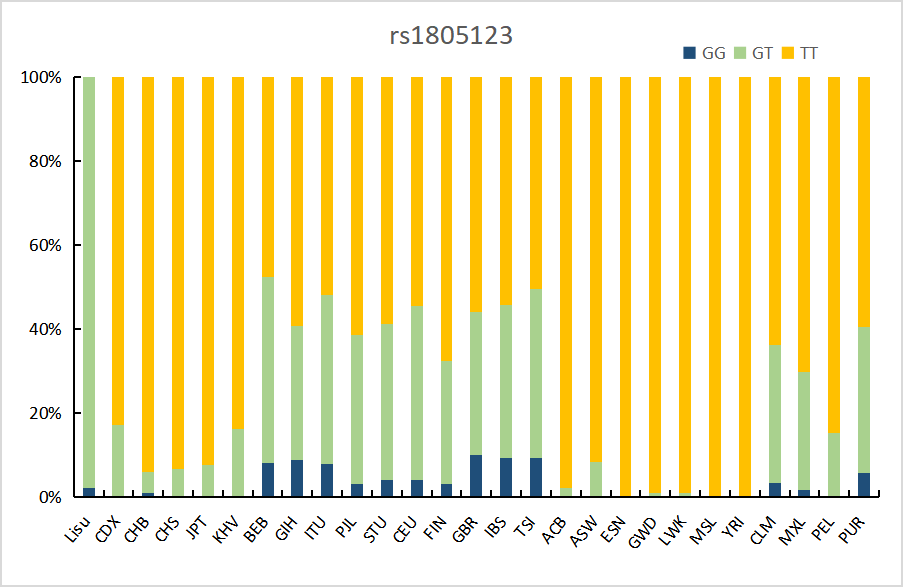


**Supplementary Figure 3** The genotype frequency distribution of rs1805123 (*KCNH2*) among 27 populations. The value of the Y axis represents the genotype frequency (%).

**
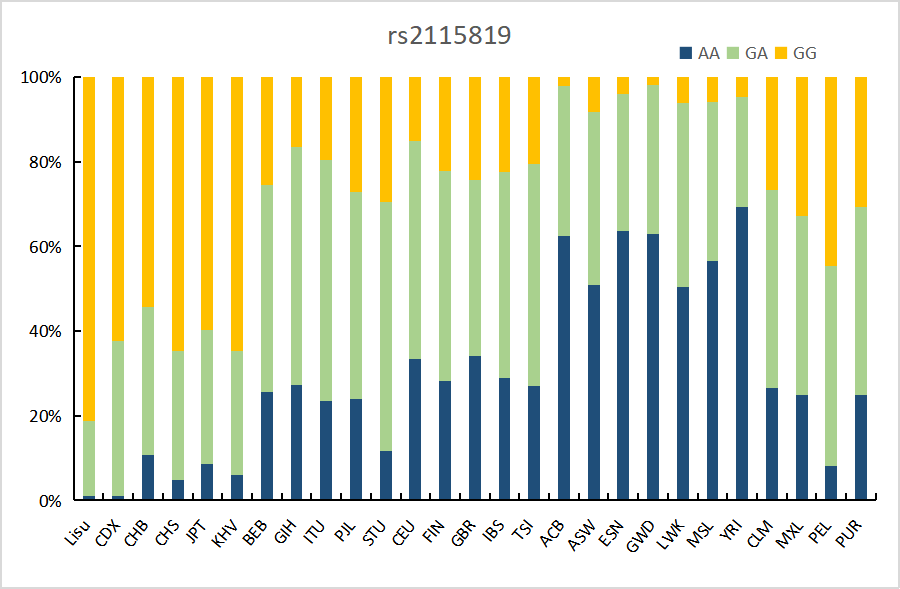
**

**Supplementary Figure 4** The genotype frequency distribution of rs2115819 (*ALOX5*) among 27 populations. The value of the Y axis represents the genotype frequency (%).


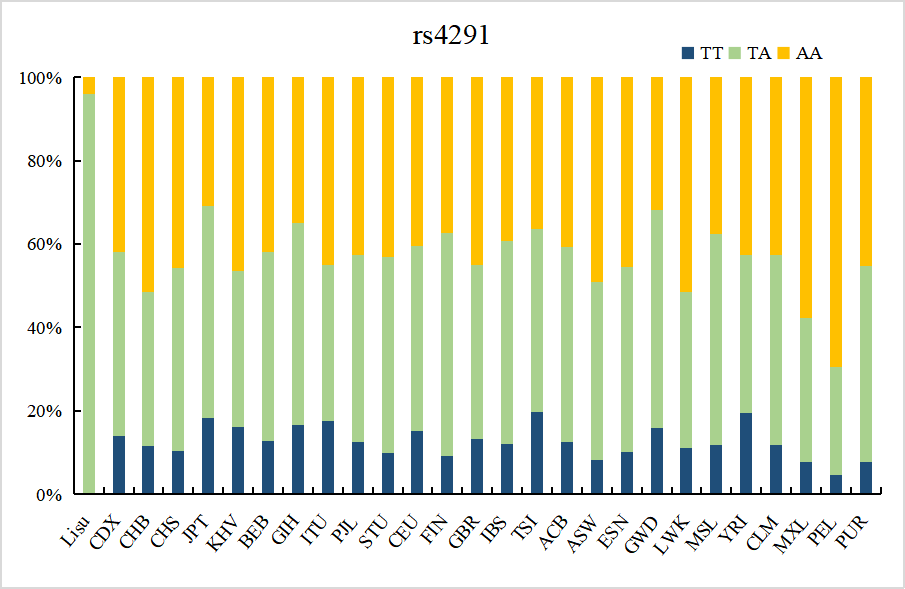


**Supplementary Figure 5** The genotype frequency distribution of rs4291 (*ACE*) among 27 populations. The value of the Y axis represents the genotype frequency (%).

**
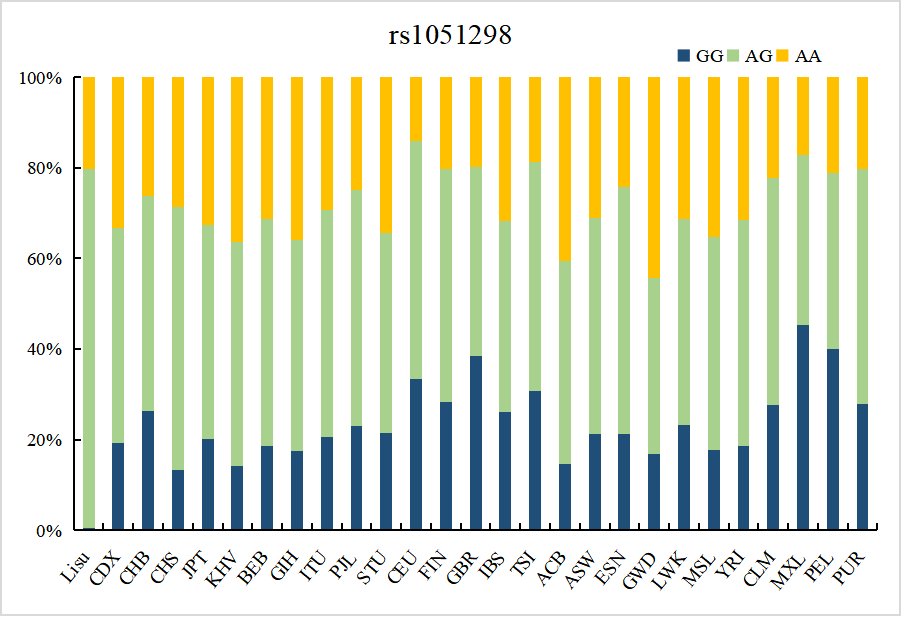
**

**Supplementary Figure 6** The genotype frequency distribution of rs1051298 (*SLC19A1*) among 27 populations. The value of the Y axis represents the genotype frequency (%).


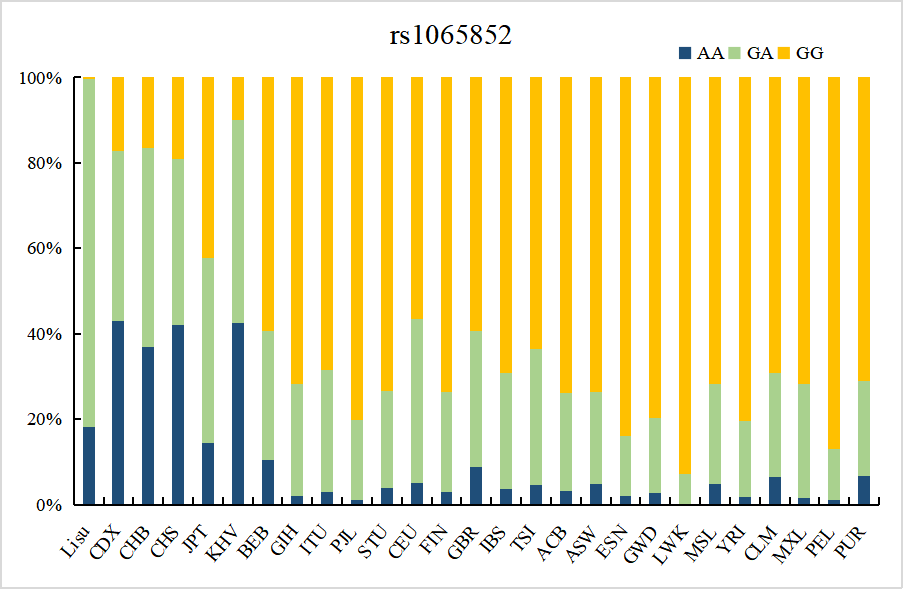


**Supplementary Figure 7** The genotype frequency distribution of rs1065852 (*CYP2D6*) among 27 populations. The value of the Y axis represents the genotype frequency (%).
